# Supplementary material for: Allosteric activators of muscarinic receptors as novel approaches for treatment of CNS disorders
Source: Royal Society of Chemistry journal article supplement (doi:10.1039/c002938f), 2010-06-25
Supplement: c002938f.pdf [file c002938f.pdf]

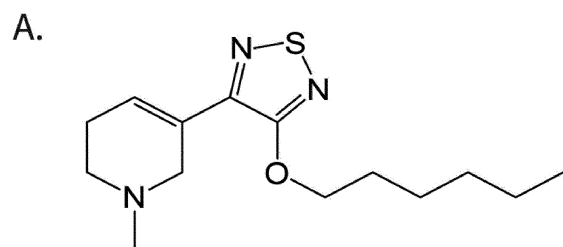

Xanolamine

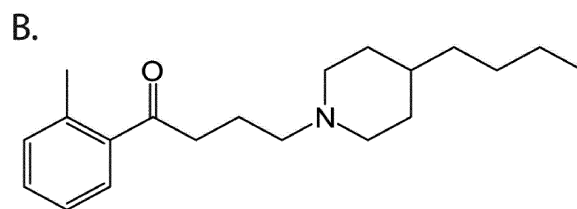

AC-42

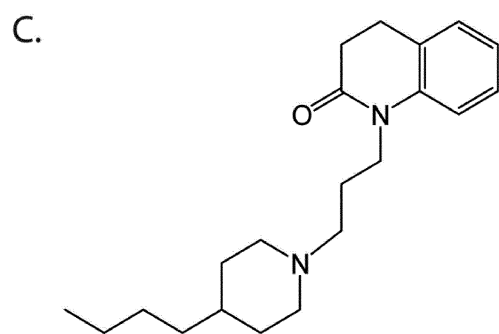

77-LH-28-1

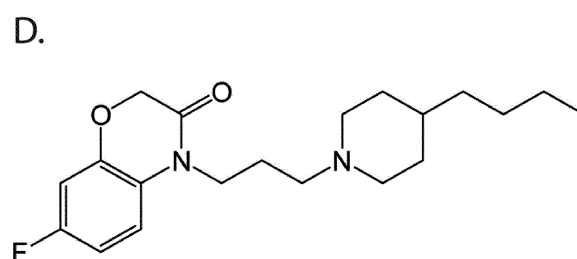

AC-260584

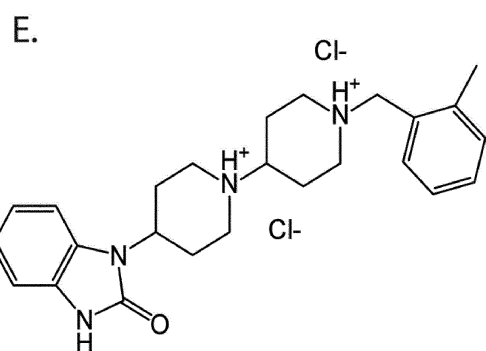

TBPB

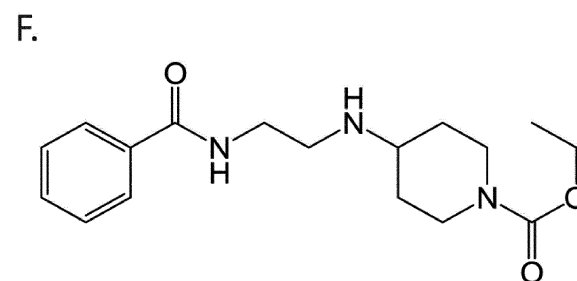

VU 0184670

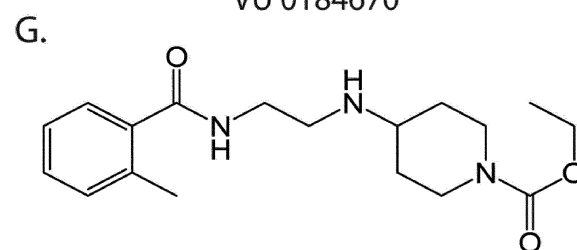

VU 0357017

Supplemental Figure 1. Chemical structures of recently developed mAChR agonists.

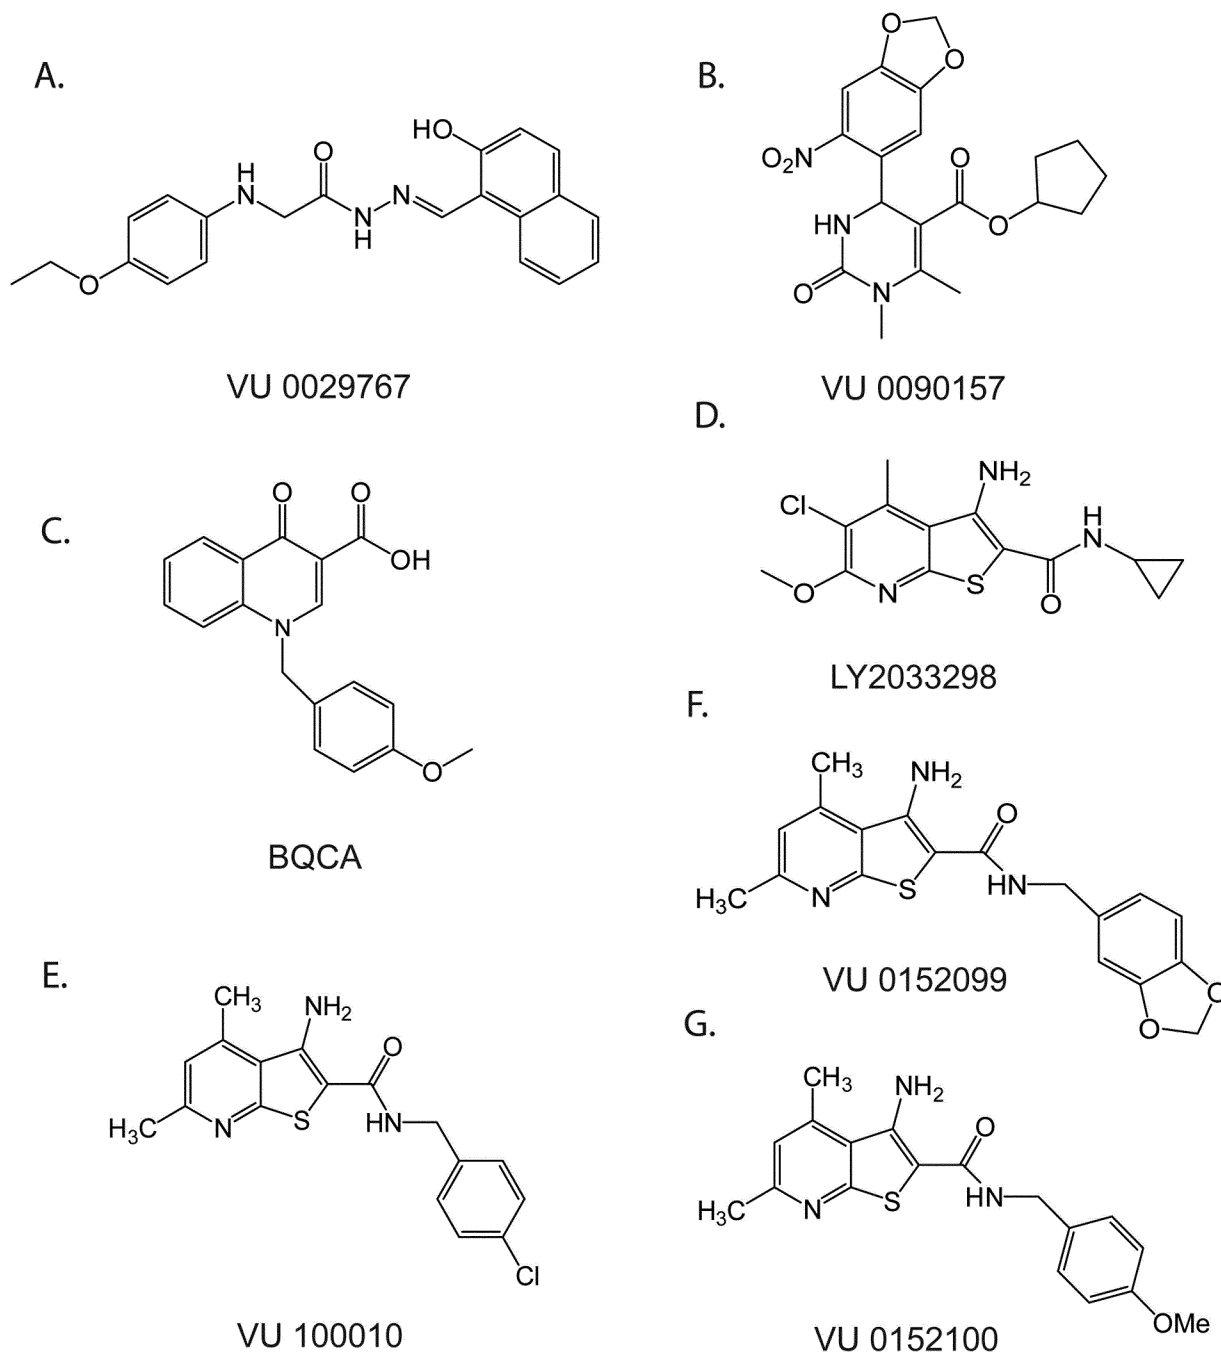

Supplemental Figure 2. Chemical structures of muscarinic positive allosteric modulators.
